# Supplementary material for: N-doped carbon layer cladded carbon sphere for broadband and boosted microwave attenuation capacity
Source: Royal Society of Chemistry journal article supplement (doi:10.1039/d4nr02405b), 2024-01-01
Supplement: d4nr02405b1.pdf [file d4nr02405b1.pdf]

## N-doped carbon layer clad carbon sphere for broadband and boosted microwave attenuation capacity

Yuke Zheng,<sup>a</sup> Yunliang Dai,<sup>a</sup> Yiwen Fu<sup>\*b</sup> and Xiaojuan Zhang<sup>\*a</sup>

<sup>a</sup> School of Light Industry Science and Engineering, Beijing Technology and Business University, Beijing 100048, China

<sup>b</sup> School of Environment and Surveying Engineering, Suzhou University, Suzhou 234000, China

E-mail: Xiaojuan Zhang, zhxiaojuan@btbu.edu.cn; Yiwen Fu, fuyiwen@caas.cn

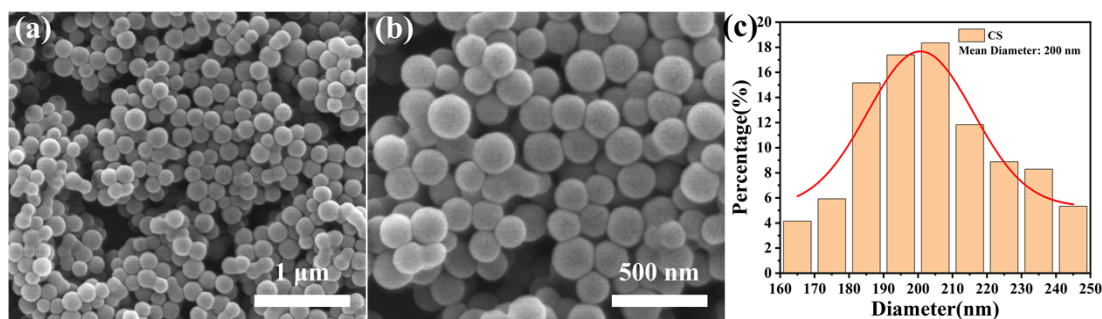

Fig. S1. (a,b) SEM images of CSs and (c) diameter statistics image.

Table S1. The proportion of carbon and nitrogen element in the C@NC nanospheres.

| Element | C        |          | N        |          |
|---------|----------|----------|----------|----------|
|         | Weight % | Atomic % | Weight % | Atomic % |
| C@NC-1  | 87.15    | 88.78    | 12.85    | 11.22    |
| C@NC-2  | 84.21    | 86.15    | 15.79    | 13.85    |
| C@NC-3  | 71.99    | 74.98    | 28.01    | 25.02    |

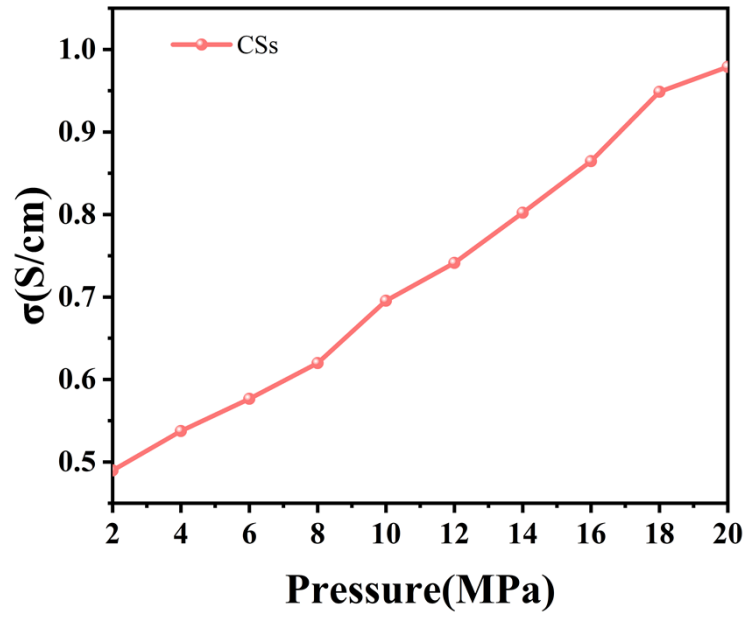

Fig. S2. The powder conductivity of pyrolytic CSs under different pressure.

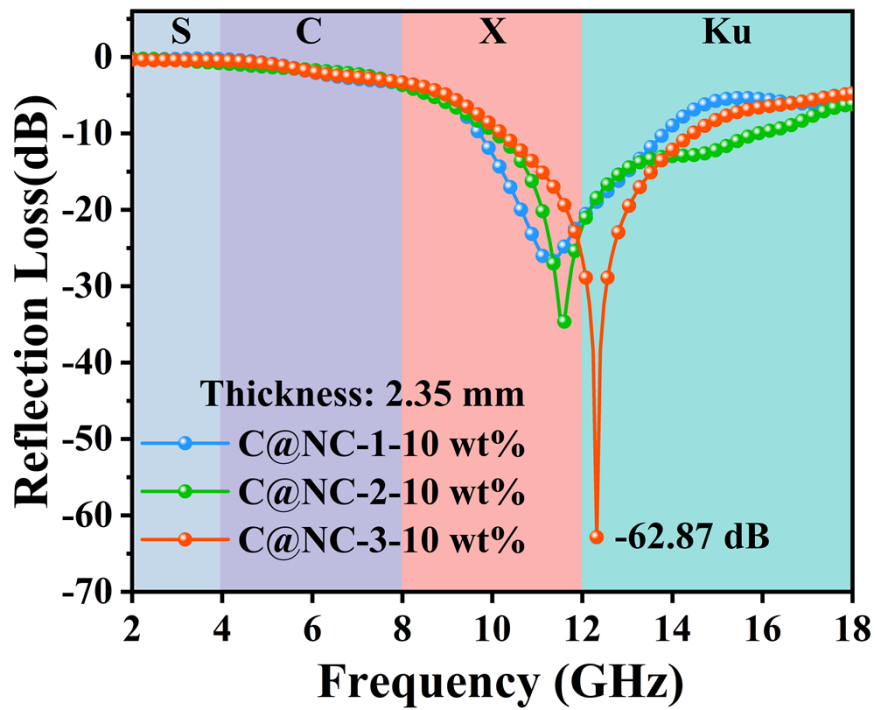

Fig. S3. The RL pattern of C@NC/PVDF composites with a filler loading of 10 wt% at 2.35 mm.

**Table S2.** Comparison of EMW absorption properties with other publications

| Sample                                     | Matrix   | Filling amount<br>(wt%) | RL <sub>min</sub> (dB) | Thickness (mm) | EAB (GHz) | Thickness (mm) |
|--------------------------------------------|----------|-------------------------|------------------------|----------------|-----------|----------------|
| CS                                         | paraffin | 25.0                    | -37.20                 | 2.00           | 5.75      | 2.00           |
| wrinkled carbon<br>microspheres            | paraffin | 50                      | -49.45                 | 1.90           | 4.75      | 1.90           |
| MWCNTs/rGO/PPy                             | paraffin | 30                      | -57.00                 | 2.10           | 4.60      | 2.10           |
| hollow bowl-like carbon                    | paraffin | 4                       | -50.00                 | 2.26           | 7.04      | 2.00           |
| hollow carbon cubes                        | paraffin | 5                       | -50.50                 | 2.70           | 6.20      | 2.70           |
| Yolk-shell C@C                             | paraffin | 50.0                    | -34.80                 | 1.85           | 5.40      | 2.00           |
| nanodiamond@hollow<br>carbon sphere        | paraffin | 5                       | -47.1                  | 2.15           | 3.40      | 2.15           |
| C@void@C                                   | paraffin | 50.0                    | -27.50                 | 2.96           | 4.90      | 2.00           |
| graphite@silicon carbide                   | Rubber   | 73.7                    | -31.90                 | 2.00           | 2.90      | 2.00           |
| carbon@polyaniline<br>microspheres         | paraffin | 30.0                    | -59.60                 | 2.20           | 5.40      | 2.20           |
| prism-shaped hollow<br>carbon@ polyaniline | paraffin | 30                      | -64.00                 | 2.50           | 5.00      | 2.50           |
| C@NC-2                                     | PVDF     | 10.0                    | -51.89                 | 1.68           | 6.29      | 2.01           |
| C@NC-3                                     | PVDF     | 10.0                    | -62.87                 | 2.35           | 4.62      | 1.96           |

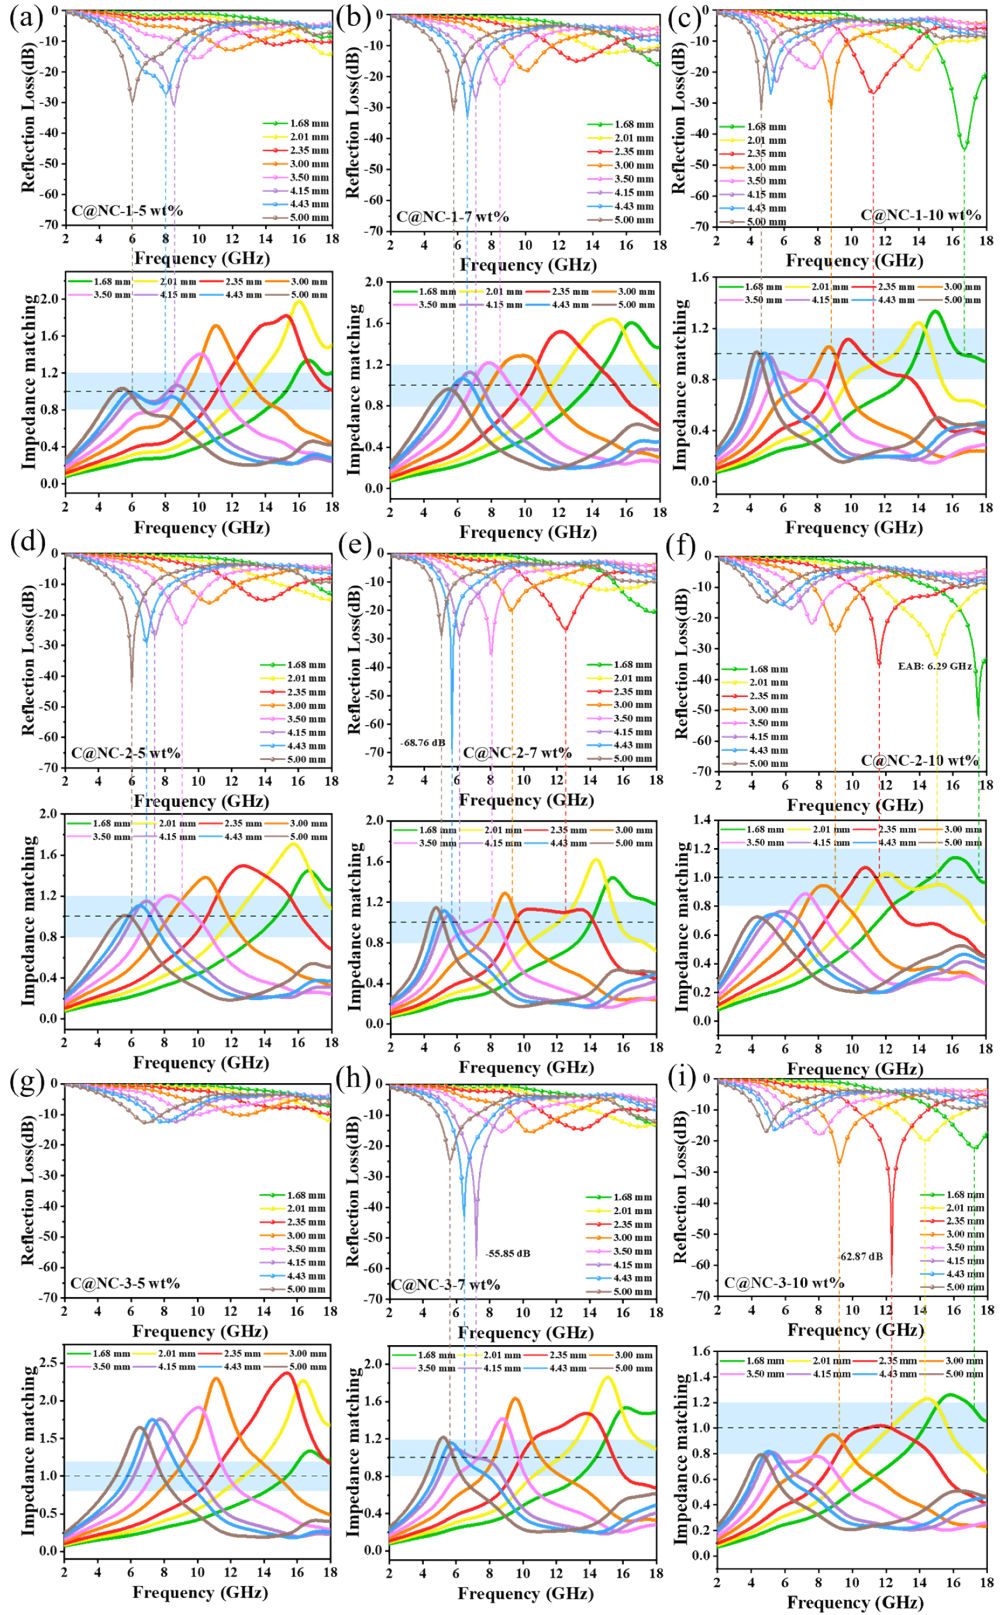

**Fig. S4.** RL curves and corresponding impedance matching characteristics of (a-c) C@NC-1/PVDF, (d-e) C@NC-2/PVDF and (g-i) C@NC-3/PVDF composites with different filler loadings.
